# Supplementary material for: Nutritional and Oral Hygiene Knowledge versus Reported Behavior of Children and Adolescents—A Cross-Sectional Interview-Based Study
Source: MDPI journal article supplement (doi:10.3390/ijerph191610055), 2022-08-15
Supplement: s1 [file s1]

| <b>Variables</b>                           | Questionnaire Year 2016 |                       | Questionnaire Year 2017 |                       | Questionnaire Year 2018 |                       | All Years                                   |                       |
|--------------------------------------------|-------------------------|-----------------------|-------------------------|-----------------------|-------------------------|-----------------------|---------------------------------------------|-----------------------|
|                                            | Nutritional Knowledge   | Nutritional Behaviour | Nutritional Knowledge   | Nutritional Behaviour | Nutritional Knowledge   | Nutritional Behaviour | Nutritional Knowledge                       | Nutritional Behaviour |
| <b>All children</b>                        | <b>93 (100%)</b>        |                       | <b>125 (100%)</b>       | <b>115 (100%)</b>     | <b>110 (100%)</b>       | <b>111 (100%)</b>     | <b>328 (100%)</b>                           | <b>319 (100%)</b>     |
| <b>Gender</b>                              |                         |                       |                         |                       |                         |                       |                                             |                       |
| Boys                                       | 38 (40.9%)              |                       | 36 (28.8%)              | 46 (40.0%)            | 37 (33.6%)              | 37 (33.3%)            | 111 (33.8%)                                 | 121 (37.9%)           |
| Girls                                      | 39 (41.9%)              |                       | 65 (52.0%)              | 63 (54.8%)            | 62 (56.4%)              | 57 (51.4%)            | 166 (50.6%)                                 | 159 (49.8%)           |
| missing                                    | 16 (17.2%)              |                       | 24 (19.2%)              | 6 (5.2%)              | 11 (10.0%)              | 17 (15.3%)            | 51 (15.6%)                                  | 39 (12.2%)            |
| <b>Age</b>                                 |                         |                       |                         |                       |                         |                       |                                             |                       |
| 3-10yrs                                    | 53 (57.2%)              |                       | 67 (53.6%)              | 85 (73.8%)            | 75 (68.1%)              | 66 (59.6%)            | 195 (59.5%)                                 | 204 (63.9%)           |
| as of 11yrs                                | 10 (10.8%)              |                       | 17 (13.6%)              | 22 (19.1%)            | 15 (13.6%)              | 21 (18.9%)            | 42 (12.8%)                                  | 53 (16.6%)            |
| missing                                    | 30 (32.0%)              |                       | 41 (32.8%)              | 8 (7.0%)              | 20 (18.2%)              | 24 (21.6%)            | 91 (27.7%)                                  | 62 (19.4%)            |
| <b>Frequency of eating sweets*</b>         |                         |                       |                         |                       |                         |                       |                                             |                       |
| <b>daily</b>                               | <b>66 (71.1%)</b>       | <b>92 (98.9%)</b>     | <b>76 (60.8%)</b>       | <b>114 (99.1%)</b>    | <b>84 (76.4%)</b>       | <b>109 (98.2%)</b>    | <b>226 (68.9%)</b>                          | <b>315 (98.7%)</b>    |
| Boys                                       | 25 (65.8%)              | 38 (100.0%)           | 21 (58.4%)              | 46 (100.0%)           | 24 (64.8%)              | 36 (97.3%)            | 70 (63.1%)                                  | 120 (99.1%)           |
| Girls                                      | 27 (69.2%)              | 38 (97.4%)            | 39 (60.0%)              | 62 (98.4%)            | 51 (82.3%)              | 57 (100.0%)           | 117 (70.5%)                                 | 157 (98.7%)           |
| 3-10 yr olds                               | 36 (68.0%)              | 53 (100.0%)           | 42 (62.7%)              | 84 (98.9%)            | 56 (74.7%)              | 65 (98.5%)            | 134 (68.7%)                                 | 202 (99.0%)           |
| as of 11yrs old                            | 9 (90.0%)               | 10 (100.0%)           | 9 (52.9%)               | 22 (100.0%)           | 14 (93.3%)              | 21 (100.0%)           | 32 (76.2%)                                  | 63 (100.0%)           |
| <b>never</b>                               | <b>26 (28.0%)</b>       | <b>1 (1.1%)</b>       | <b>48 (38.4%)</b>       | <b>1 (0.9%)</b>       | <b>26 (23.6%)</b>       | <b>2 (1.8%)</b>       | <b>100 (30.5%)</b>                          | <b>4 (1.3%)</b>       |
| Boys                                       | 12 (31.6%)              | 0                     | 15 (41.7%)              | 0                     | 13 (35.1%)              | 1 (2.7%)              | 40 (36.0%)                                  | 1 (0.008%)            |
| Girls                                      | 12 (30.8%)              | 1 (2.7%)              | 26 (40.0%)              | 1 (1.6%)              | 11 (17.7%)              | 0                     | 49 (29.5%)                                  | 2 (1.3%)              |
| 3-10 yr olds                               | 16 (30.2%)              | 0 (0%)                | 25 (37.3%)              | 1 (1.2%)              | 19 (25.4%)              | 1 (1.5%)              | 60 (30.8%)                                  | 2 (0.009%)            |
| as of 11yrs old                            | 1 (10.0%)               | 0 (0%)                | 8 (47.1%)               | 0                     | 1 (6.7%)                | 0                     | 10 (23.8%)                                  | 0                     |
| <b>other</b>                               | <b>1 (1.1%)</b>         | <b>0</b>              | <b>Not collected</b>    | <b>Not collected</b>  | <b>Not collected</b>    | <b>Not collected</b>  | <b>1 (0.003%)</b>                           | <b>0</b>              |
| Boys                                       | 1 (2.6%)                | 0                     |                         |                       |                         |                       | 1 (0.009%)                                  | 0                     |
| Girls                                      | 0                       | 0                     |                         |                       |                         |                       | 0                                           | 0                     |
| 3-10 yr olds                               | 1 (1.9%)                | 0                     |                         |                       |                         |                       | 1 (0.005%)                                  | 0                     |
| as of 11yrs old                            | 0                       | 0                     |                         |                       |                         |                       | 0                                           | 0                     |
| missing                                    | 0                       | 0                     | 1 (0.8%)                | 0                     | 0                       | 0                     | 1 (0.003%)                                  | 0                     |
|                                            |                         |                       |                         |                       |                         |                       |                                             | N = see above in 2016 |
| <b>Snacks*</b>                             |                         |                       |                         | Not collected         |                         | Not collected         |                                             |                       |
| <b>fruit</b>                               | <b>61 (65.6%)</b>       | <b>37 (39.8%)</b>     | <b>93 (74.4%)</b>       |                       | <b>71 (64.5%)</b>       |                       | <b>225 (68.6%)</b>                          | <b>37 (39.8%)</b>     |
| Boys                                       | 24 (63.2%)              | 9 (23.7%)             | 24 (66.7%)              |                       | 23 (62.2%)              |                       | 71 (64.0%)                                  | 9 (23.7%)             |
| Girls                                      | 26 (66.7%)              | 22 (56.4%)            | 51 (78.5%)              |                       | 39 (62.9%)              |                       | 116 (70.0%)                                 | 22 (56.4%)            |
| 3-10 yr olds                               | 35 (66.0%)              | 21 (39.6%)            | 50 (74.6%)              |                       | 48 (64.0%)              |                       | 133 (68.2%)                                 | 21 (39.6%)            |
| as of 11yrs old                            | 4 (40.0%)               | 2 (20.0%)             | 12 (70.6%)              |                       | 9 (60.0%)               |                       | 25 (59.5%)                                  | 2 (20.0%)             |
| <b>sweets</b>                              | <b>4 (4.3%)</b>         | <b>24 (25.8%)</b>     | <b>11 (8.8%)</b>        |                       | <b>12 (10.9%)</b>       |                       | <b>27 (8.2%)</b>                            | <b>24 (25.8%)</b>     |
| Boys                                       | 3 (7.9%)                | 12 (31.8%)            | 4 (11.2%)               |                       | 4 (10.8%)               |                       | 11 (10.0%)                                  | 12 (31.8%)            |
| Girls                                      | 1 (2.6%)                | 8 (20.5%)             | 4 (6.2%)                |                       | 7 (11.3%)               |                       | 12 (7.2%)                                   | 8 (20.5%)             |
| 3-10 yr olds                               | 4 (7.5%)                | 13 (24.5%)            | 5 (7.5%)                |                       | 7 (9.4%)                |                       | 16 (8.2%)                                   | 13 (24.5%)            |
| as of 11yrs old                            | 0                       | 3 (30.0%)             | 2 (11.8%)               |                       | 3 (20.0%)               |                       | 5 (1.2%)                                    | 3 (30.0%)             |
| <b>nothing</b>                             | <b>8 (8.6%)</b>         | <b>9 (9.7%)</b>       | <b>8 (6.4%)</b>         |                       | <b>8 (7.3%)</b>         |                       | <b>24 (7.3%)</b>                            | <b>9 (9.7%)</b>       |
| Boys                                       | 6 (15.8%)               | 5 (13.2%)             | 4 (11.2%)               |                       | 5 (13.5%)               |                       | 15 (13.5%)                                  | 5 (13.2%)             |
| Girls                                      | 1 (2.6%)                | 3 (7.7%)              | 3 (4.6%)                |                       | 3 (4.8%)                |                       | 7 (4.2%)                                    | 3 (7.7%)              |
| 3-10 yr olds                               | 4 (7.5%)                | 7 (13.2%)             | 5 (7.5%)                |                       | 6 (8.0%)                |                       | 15 (7.7%)                                   | 7 (13.2%)             |
| as of 11yrs old                            | 2 (20.0%)               | 0                     | 1 (5.9%)                |                       | 0                       |                       | 3 (7.1%)                                    | 0                     |
| <b>fruit yoghurt/bread/pretzels</b>        | <b>11 (11.8%)</b>       | <b>12 (13.0%)</b>     | <b>8 (6.4%)</b>         |                       | <b>11 (10.0%)</b>       |                       | <b>30 (9.2%)</b>                            | <b>12 (13.0%)</b>     |
| Boys                                       | 4 (10.5%)               | 6 (15.8%)             | 3 (8.4%)                |                       | 2 (5.4%)                |                       | 9 (8.1%)                                    | 6 (15.8%)             |
| Girls                                      | 4 (10.3%)               | 3 (7.7%)              | 4 (6.1%)                |                       | 8 (13.2%)               |                       | 16 (9.6%)                                   | 3 (7.7%)              |
| 3-10 yr olds                               | 5 (9.4%)                | 8 (15.1%)             | 4 (6.0%)                |                       | 8 (10.7%)               |                       | 17 (8.7%)                                   | 8 (15.1%)             |
| as of 11yrs old                            | 2 (20.0%)               | 1 (10.0%)             | 1 (5.9%)                |                       | 2 (13.3%)               |                       | 5 (11.9%)                                   | 1 (10.0%)             |
| <b>dental care chewing gum</b>             | <b>2 (2.2%)</b>         | <b>3 (3.2%)</b>       | <b>5 (4.0%)</b>         |                       | <b>8 (7.3%)</b>         |                       | <b>15 (4.6%)</b>                            | <b>3 (3.2%)</b>       |
| Boys                                       | 0                       | 1 (2.6%)              | 1 (2.8%)                |                       | 3 (8.1%)                |                       | 4 (3.6%)                                    | 1 (2.6%)              |
| Girls                                      | 2 (5.1%)                | 0                     | 3 (4.6%)                |                       | 5 (8.1%)                |                       | 10 (6.0%)                                   | 0                     |
| 3-10 yr olds                               | 0                       | 1 (1.9%)              | 3 (4.5%)                |                       | 6 (8.0%)                |                       | 9 (4.6%)                                    | 1 (1.9%)              |
| as of 11yrs old                            | 1 (10.0%)               | 0                     | 1 (5.9%)                |                       | 1 (6.7%)                |                       | 3 (7.1%)                                    | 0                     |
| <b>other</b>                               | <b>7 (7.5%)</b>         | <b>8 (8.6%)</b>       | <b>Not collected</b>    |                       | <b>Not collected</b>    |                       | <b>7 (2.1%)</b>                             | <b>8 (8.6%)</b>       |
| Boys                                       | 1 (2.6%)                | 5 (13.2%)             |                         |                       |                         |                       | 1 (0.009%)                                  | 5 (13.2%)             |
| Girls                                      | 5 (12.8%)               | 3 (7.9%)              |                         |                       |                         |                       | 5 (3.0%)                                    | 3 (7.9%)              |
| 3-10 yr olds                               | 5 (9.4%)                | 3 (5.7%)              |                         |                       |                         |                       | 5 (2.7%)                                    | 3 (5.7%)              |
| as of 11yrs old                            | 1 (10.0%)               | 3 (30.0%)             |                         |                       |                         |                       | 1 (2.4%)                                    | 3 (30.0%)             |
|                                            |                         |                       |                         |                       |                         |                       | N= 2017+2018 (no values from 2016 included) |                       |
| <b>Frequency of snacks*</b>                | <b>Not collected</b>    |                       |                         |                       |                         |                       |                                             |                       |
| <b>always/usually (&gt;4 times/day)</b>    |                         | <b>42 (45.2%)</b>     | <b>63 (50.4%)</b>       | <b>59 (51.3%)</b>     | <b>50 (45.5%)</b>       | <b>42 (37.8%)</b>     | <b>113 (48.1%)</b>                          | <b>143 (44.9%)</b>    |
| Boys                                       |                         | 14 (36.8%)            | 15 (41.7%)              | 26 (65.5%)            | 17 (46.0%)              | 10 (27.0%)            | 32 (43.8%)                                  | 50 (41.3%)            |
| Girls                                      |                         | 22 (56.5%)            | 36 (55.4%)              | 29 (46.0%)            | 31 (50.0%)              | 25 (43.9%)            | 67 (52.8%)                                  | 76 (47.8%)            |
| 3-10 yr olds                               |                         | 22 (41.5%)            | 35 (52.2%)              | 42 (49.4%)            | 36 (48.0%)              | 25 (37.9%)            | 71 (50.0%)                                  | 89 (43.6%)            |
| as of 11yrs old                            |                         | 5 (50.9%)             | 8 (47.1%)               | 12 (54.5%)            | 7 (46.7%)               | 8 (44.5%)             | 15 (46.9%)                                  | 25 (47.1%)            |
| <b>sometimes/ seldom (&lt;4 times/day)</b> |                         | <b>48 (51.7%)</b>     | <b>61 (48.8%)</b>       | <b>52 (45.2%)</b>     | <b>55 (50.0%)</b>       | <b>67 (60.4%)</b>     | <b>116 (49.4%)</b>                          | <b>167 (52.4%)</b>    |
| Boys                                       |                         | 23 (60.5%)            | 21 (58.4%)              | 18 (39.1%)            | 19 (51.4%)              | 25 (67.6%)            | 40 (54.8%)                                  | 66 (54.5%)            |
| Girls                                      |                         | 15 (38.5%)            | 28 (43.1%)              | 32 (50.8%)            | 30 (48.4%)              | 32 (56.1%)            | 58 (45.7%)                                  | 79 (49.7%)            |
| 3-10 yr olds                               |                         | 28 (52.8%)            | 32 (47.8%)              | 39 (45.9%)            | 37 (49.4%)              | 41 (62.1%)            | 69 (48.6%)                                  | 108 (52.9%)           |
| as of 11yrs old                            |                         | 5 (50.0%)             | 9 (52.9%)               | 10 (45.5%)            | 8 (53.4%)               | 11 (61.1%)            | 17 (53.1%)                                  | 26 (49.1%)            |
| <b>never</b>                               |                         | <b>2 (2.2%)</b>       | <b>1 (0.8%)</b>         | <b>4 (3.5%)</b>       | <b>4 (3.6%)</b>         | <b>2 (1.8%)</b>       | <b>5 (2.1%)</b>                             | <b>8 (2.5%)</b>       |
| Boys                                       |                         | 1 (2.6%)              | 0                       | 2 (4.4%)              | 1 (2.7%)                | 2 (5.4%)              | 1 (1.4%)                                    | 5 (4.1%)              |
| Girls                                      |                         | 1 (2.6%)              | 1 (1.5%)                | 2 (3.2%)              | 1 (1.6%)                | 0                     | 2 (1.6%)                                    | 3 (1.9%)              |
| 3-10 yr olds                               |                         | 2 (3.8%)              | 0                       | 4 (4.7%)              | 2 (2.7%)                | 0                     | 2 (1.4%)                                    | 6 (2.9%)              |
| as of 11yrs old                            |                         | 0                     | 0                       | 0                     | 0                       | 2 (11.1%)             | 0                                           | 2 (3.8%)              |

|                                                      |                      |                   |                      |                      |                      |                      |                      |                    |
|------------------------------------------------------|----------------------|-------------------|----------------------|----------------------|----------------------|----------------------|----------------------|--------------------|
| <b>other</b>                                         |                      | <b>1 (1.1%)</b>   | <b>Not collected</b> | <b>1 (0.003%)</b>  |
| <i>Boys</i>                                          |                      | 0                 | 0                    | 0                    |                      |                      |                      | 0                  |
| <i>Girls</i>                                         |                      | 1 (2.6%)          | 0                    | 0                    |                      |                      |                      | 1 (0.006%)         |
| 3-10 yr olds                                         |                      | 1 (1.9%)          |                      | 0                    | 0                    |                      |                      | 1 (0.005%)         |
| as of 11yrs old                                      |                      | 0                 | 0                    | 0                    | 0                    | 0                    |                      | 0                  |
| <b>missing</b>                                       |                      | <b>0</b>          | <b>0</b>             | <b>0</b>             | <b>1 (0.9%)</b>      | <b>0</b>             | <b>1 (0.004%)</b>    | <b>0</b>           |
|                                                      |                      |                   |                      |                      |                      |                      |                      |                    |
| <b><u>Favorite/healthy drinks*</u></b>               |                      |                   |                      |                      |                      |                      |                      |                    |
| <b>Sugar sweetened beverage (SBB)</b>                | <b>Not collected</b> | <b>63 (67.7%)</b> | <b>37 (29.6%)</b>    | <b>88 (76.5%)</b>    | <b>22 (20.0%)</b>    | <b>63 (56.8%)</b>    | <b>59 (25.1%)</b>    | <b>214 (67.1%)</b> |
| <i>Boys</i>                                          |                      | 26 (68.4%)        | 14 (38.9%)           | 36 (78.3%)           | 4 (10.8%)            | 24 (64.9%)           | 18 (24.7%)           | 86 (71.1%)         |
| <i>Girls</i>                                         |                      | 25 (64.1%)        | 15 (23.1%)           | 48 (76.2%)           | 14 (22.6%)           | 31 (54.4%)           | 29 (22.9%)           | 104 (65.4%)        |
| 3-10 yr olds                                         |                      | 36 (67.9%)        | 17 (25.4%)           | 69 (81.2%)           | 17 (22.7%)           | 40 (60.6%)           | 34 (23.9%)           | 145 (71.1%)        |
| as of 11yrs old                                      |                      | 6 (60.0%)         | 3 (17.7%)            | 13 (59.1%)           | 1 (6.7%)             | 13 (61.9%)           | 4 (12.5%)            | 32 (60.4%)         |
| <b>water/tea (unsweetened)</b>                       |                      | <b>24 (25.8%)</b> | <b>87 (69.6%)</b>    | <b>25 (21.7%)</b>    | <b>88 (80.0%)</b>    | <b>46 (41.4%)</b>    | <b>175 (74.5%)</b>   | <b>95 (29.8%)</b>  |
| <i>Boys</i>                                          |                      | 9 23.7%)          | 22 (61.2%)           | 10 (21.7%)           | 33 (89.2%)           | 12 (32.4%)           | 55 (75.3%)           | 31 (25.6%)         |
| <i>Girls</i>                                         |                      | 12 (30.8%)        | 50 (76.9%)           | 13 (20.6%)           | 48 (77.4%)           | 26 (45.6%)           | 98 (77.2%)           | 51 (32.1%)         |
| 3-10 yr olds                                         |                      | 12 (22.6%)        | 50 (74.6%)           | 15 (17.6%)           | 58 (77.4%)           | 25 (37.9%)           | 108 (76.1%)          | 52 (25.5%)         |
| as of 11yrs old                                      |                      | 4 (40.0%)         | 14 (82.4%)           | 8 (36.4%)            | 14 (93.4%)           | 8 (38.1%)            | 28 (87.5%)           | 20 (37.7%)         |
| <b>cocoa</b>                                         |                      | <b>5 (5.4%)</b>   | <b>1 (0.8%)</b>      | <b>2 (1.7%)</b>      | <b>0</b>             | <b>2 (1.8%)</b>      | <b>1 (0.004%)</b>    | <b>9 (2.8%)</b>    |
| <i>Boys</i>                                          |                      | 3 (7.9%)          | 0                    | 0                    | 0                    | 1 (2.7%)             | 0                    | 4 (3.3%)           |
| <i>Girls</i>                                         |                      | 1 (2.6%)          | 0                    | 2 (3.2%)             | 0                    | 0                    | 0                    | 3 (1.9%)           |
| 3-10 yr olds                                         |                      | 4 (7.5%)          | 0                    | 1 (1.2%)             | 0                    | 1 (1.5%)             | 0                    | 6 (2.9%)           |
| as of 11yrs old                                      |                      | 0                 | 0                    | 1 (4.5%)             | 0                    | 0                    | 0                    | 1 (1.9%)           |
| <b>other</b>                                         |                      | <b>1 (1.1%)</b>   | <b>Not collected</b> | <b>1 (0.003%)</b>  |
| <i>Boys</i>                                          |                      | 0                 |                      |                      |                      |                      |                      | 0                  |
| <i>Girls</i>                                         |                      | 1 (2.6%)          |                      |                      |                      |                      |                      | 1 (0.006%)         |
| 3-10 yr olds                                         |                      | 1 (1.9%)          |                      |                      |                      |                      |                      | 1 (0.005%)         |
| as of 11yrs old                                      |                      | 0                 |                      |                      |                      |                      |                      | 0                  |
| <b><u>Frequency of sweet drinks consumption*</u></b> | <b>Not collected</b> | <b>37 (39.8%)</b> | <b>28 (22.4%)</b>    | <b>39 (33.9%)</b>    | <b>29 (26.3%)</b>    | <b>33 (29.7%)</b>    | <b>57 (24.3%)</b>    | <b>109 (34.2%)</b> |
| <b>every day</b>                                     |                      | 17 (44.7%)        | 10 (27.8%)           | 20 (43.5%)           | 8 (21.6%)            | 15 (40.5%)           | 18 (24.7%)           | 52 (43.0%)         |
| <i>Boys</i>                                          |                      | 12 (30.8%)        | 14 (21.5%)           | 17 (27.0%)           | 17 (27.4%)           | 14 (24.6%)           | 31 (24.4%)           | 43 (27.0%)         |
| <i>Girls</i>                                         |                      | 19 (35.8%)        | 14 (20.9%)           | 31 (36.5%)           | 16 (21.3%)           | 23 (34.8%)           | 30 (21.1%)           | 73 (35.8%)         |
| 3-10 yr olds                                         |                      | 5 (50.0%)         | 4 (23.5%)            | 5 (22.7%)            | 7 (46.7%)            | 6 (28.6%)            | 11 (34.4%)           | 16 (30.2%)         |
| as of 11yrs old                                      |                      | <b>55 (59.2%)</b> | <b>94 (75.2%)</b>    | <b>76 (66.0%)</b>    | <b>81 (73.6%)</b>    | <b>78 (70.3%)</b>    | <b>175 (74.5%)</b>   | <b>209 (65.5%)</b> |
| <b>less than every day</b>                           |                      | 21 (55.3%)        | 26 (72.3%)           | 26 (56.6%)           | 29 (78.4%)           | 22 (59.5%)           | 55 (75.4%)           | 69 (57.0%)         |
| <i>Boys</i>                                          |                      | 26 (66.7%)        | 49 (75.4%)           | 46 (72.9%)           | 45 (72.6%)           | 43 (75.4%)           | 94 (74.0%)           | 115 (72.3%)        |
| <i>Girls</i>                                         |                      | 33 (62.2%)        | 52 (77.6%)           | 54 (63.6%)           | 59 (78.6%)           | 43 (65.2%)           | 111 (78.1%)          | 130 (63.7%)        |
| 3-10 yr olds                                         |                      | 5 (50.0%)         | 13 (76.5%)           | 17 (77.3%)           | 8 (53.4%)            | 15 (71.5%)           | 21 (65.7%)           | 37 (69.8%)         |
| as of 11yrs old                                      |                      | <b>1 (1.1%)</b>   | <b>Not collected</b> | <b>1 (0.003%)</b>  |
| <b>other</b>                                         |                      | 0                 |                      |                      |                      |                      |                      | 0                  |
| <i>Boys</i>                                          |                      | 1 (2.6%)          |                      |                      |                      |                      |                      | 1 (0.006%)         |
| <i>Girls</i>                                         |                      | 1 (1.9%)          |                      |                      |                      |                      |                      | 1 (0.005%)         |
| 3-10 yr olds                                         |                      | 0                 |                      |                      |                      |                      |                      | 0                  |
| as of 11yrs old                                      |                      | <b>0</b>          | <b>3 (2.4%)</b>      | <b>0</b>             | <b>0</b>             | <b>0</b>             | <b>3 (1.3%)</b>      | <b>0</b>           |
| <b>missing</b>                                       |                      |                   | 2 (3.1%)             |                      |                      |                      | 2 (1.6%)             |                    |
| <i>Girls</i>                                         |                      |                   | 1 (1.5%)             |                      |                      |                      | 1 (0.007%)           |                    |
| 3-10 yr olds                                         |                      |                   |                      |                      |                      |                      |                      |                    |
| <b><u>Behavior after consumption of sweets*</u></b>  |                      |                   |                      |                      |                      |                      |                      |                    |
| <b>doing nothing</b>                                 | <b>7 (7.5%)</b>      | <b>63 (67.7%)</b> | <b>5 (4.0%)</b>      | <b>63 (54.8%)</b>    | <b>6 (5.5%)</b>      | <b>61 (55.0%)</b>    | <b>18 (5.5%)</b>     | <b>187 (58.6%)</b> |
| <i>Boys</i>                                          | 1 (2.6%)             | 29 (76.3%)        | 1 (2.8%)             | 28 (60.9%)           | 2 (5.4%)             | 22 (59.5%)           | 4 (3.6%)             | 79 (65.3%)         |
| <i>Girls</i>                                         | 3 (7.7%)             | 23 (59.0%)        | 3 (4.6%)             | 32 (50.8%)           | 4 (6.5%)             | 35 (61.4%)           | 10 (6.0%)            | 90 (56.6%)         |
| 3-10 yr olds                                         | 4 (7.6%)             | 36 (67.9%)        | 3 (4.5%)             | 47 (55.3%)           | 4 (5.4%)             | 42 (63.6%)           | 11 (5.6%)            | 125 (61.3%)        |
| as of 11yrs old                                      | 0                    | 5 (50.0%)         | 1 (5.9%)             | 12 (54.5%)           | 2 (13.4%)            | 12 (57.1%)           | 3 (7.1%)             | 29 (54.7%)         |
| <b>brushing teeth</b>                                | <b>68 (73.1%)</b>    | <b>12 (12.9%)</b> | <b>83 (66.4%)</b>    | <b>16 (13.9%)</b>    | <b>80 (72.7%)</b>    | <b>24 (21.6%)</b>    | <b>231 (70.4%)</b>   | <b>52 (16.3%)</b>  |
| <i>Boys</i>                                          | 29 (76.3%)           | 2 (6.3%)          | 26 (72.3%)           | 6 (13.0%)            | 27 (73.0%)           | 9 (24.3%)            | 82 (73.9%)           | 17 (14.1%)         |
| <i>Girls</i>                                         | 29 (74.4%)           | 7 (18.0%)         | 41 (63.1%)           | 10 (15.9%)           | 44 (71.0%)           | 11 (19.3%)           | 114 (68.7%)          | 28 (17.6%)         |
| 3-10 yr olds                                         | 41 (77.4%)           | 5 (9.4%)          | 48 (71.6%)           | 12 (14.1%)           | 55 (73.4%)           | 15 (22.7%)           | 144 (73.9%)          | 32 (15.7%)         |
| as of 11yrs old                                      | 8 (80.0%)            | 2 (20.0%)         | 8 (47.1%)            | 3 (13.6%)            | 9 (60.0%)            | 4 (19.1%)            | 25 (59.5%)           | 9 (17.0%)          |
| <b>rinsing mouth with mouthwash</b>                  | <b>6 (6.4%)</b>      | <b>7 (7.5%)</b>   | <b>23 (18.4%)</b>    | <b>29 (25.2%)</b>    | <b>14 (12.8%)</b>    | <b>18 (16.2%)</b>    | <b>43 (13.1%)</b>    | <b>54 (36.6%)</b>  |
| <i>Boys</i>                                          | 2 (5.3%)             | 4 (10.5%)         | 3 (8.4%)             | 8 (17.4%)            | 3 (8.1%)             | 4 (10.8%)            | 8 (7.2%)             | 16 (13.2%)         |
| <i>Girls</i>                                         | 2 (5.1%)             | 3 (7.7%)          | 17 (26.6%)           | 18 (28.6%)           | 9 (14.6%)            | 9 (15.8%)            | 28 (16.8%)           | 30 (18.8%)         |
| 3-10 yr olds                                         | 3 (5.7%)             | 5 (9.4%)          | 9 (13.4%)            | 21 (24.7%)           | 8 (10.7%)            | 6 (9.1%)             | 20 (10.3%)           | 32 (15.7%)         |
| as of 11yrs old                                      | 0                    | 1 (10.0%)         | 7 (41.2%)            | 5 (22.7%)            | 2 (13.4%)            | 5 (23.9%)            | 9 (21.4%)            | 11 (20.8%)         |
| <b>chewing dental care gum</b>                       | <b>9 (9.7%)</b>      | <b>5 (5.4%)</b>   | <b>12 (9.6%)</b>     | <b>6 (5.2%)</b>      | <b>10 (9.1%)</b>     | <b>7 (6.3%)</b>      | <b>31 (9.5%)</b>     | <b>18 (5.6%)</b>   |
| <i>Boys</i>                                          | 5 (13.2%)            | 1 (2.6%)          | 5 (13.9%)            | 3 (6.5%)             | 5 (13.5%)            | 1 (2.7%)             | 15 (13.5%)           | 5 (4.1%)           |
| <i>Girls</i>                                         | 3 (7.7%)             | 2 (5.1%)          | 3 (4.6%)             | 3 (4.8%)             | 5 (8.1%)             | 2 (3.5%)             | 11 (6.6%)            | 7 (4.4%)           |
| 3-10 yr olds                                         | 3 (5.7%)             | 2 (3.8%)          | 6 (9.0%)             | 4 (4.7%)             | 8 (10.7%)            | 2 (3.0%)             | 17 (8.7%)            | 8 (3.9%)           |
| as of 11yrs old                                      | 1 (10.0%)            | 1 (10.0%)         | 1 (5.9%)             | 2 (9.1%)             | 2 (13.4%)            | 0                    | 4 (9.5%)             | 3 (5.7%)           |
| <b>chewing sweet gum</b>                             | <b>1 (1.1%)</b>      | <b>0</b>          | <b>2 (1.6%)</b>      | <b>1 (0.9%)</b>      | <b>0</b>             | <b>1 (0.9%)</b>      | <b>3 (0.009%)</b>    | <b>2 (0.006%)</b>  |
| <i>Boys</i>                                          | 0                    | 0                 | 1 (2.8%)             | 1 (2.2%)             | 0                    | 1 (2.7%)             | 1 (0.009%)           | 2 (1.7%)           |
| <i>Girls</i>                                         | 1 (2.6%)             | 0                 | 1 (1.5%)             | 0                    | 0                    | 0                    | 2 (1.2%)             | 0                  |
| 3-10 yr olds                                         | 0                    | 0                 | 1 (1.5%)             | 1 (1.2%)             | 0                    | 1 (1.5%)             | 1 (0.005%)           | 2 (0.01%)          |
| as of 11yrs old                                      | 1 (10.0%)            | 0                 | 0                    | 0                    | 0                    | 0                    | 1 (2.4%)             | 0                  |
| <b>other</b>                                         | <b>2 (2.2%)</b>      | <b>6 (6.5%)</b>   | <b>Not collected</b> | <b>Not collected</b> | <b>Not collected</b> | <b>Not collected</b> | <b>2 (0.006%)</b>    | <b>6 (1.9%)</b>    |
| <i>Boys</i>                                          | 1 (2.6%)             | 2 (5.3%)          |                      |                      |                      |                      | 1 (0.009%)           | 2 (1.7%)           |
| <i>Girls</i>                                         | 1 (2.6%)             | 4 (10.3%)         |                      |                      |                      |                      | 1 (0.006%)           | 4 (2.5%)           |
| 3-10 yr olds                                         | 2 (3.8%)             | 5 (9.4%)          |                      |                      |                      |                      | 2 (1.0%)             | 5 (2.5%)           |
| as of 11yrs old                                      | 0                    | 1 (10.0%)         |                      |                      |                      |                      | 0                    | 1 (1.9%)           |
| <b><u>Frequency of brushing teeth*</u></b>           |                      |                   |                      |                      |                      |                      |                      |                    |
| <b>three times a day</b>                             | <b>50 (53.8%)</b>    | <b>17 (18.3%)</b> | <b>74 (59.2%)</b>    | <b>20 (17.4%)</b>    | <b>47 (42.7%)</b>    | <b>14 (12.6%)</b>    | <b>171 (52.1%)</b>   | <b>51 (16.0%)</b>  |
| <i>Boys</i>                                          | 22 (57.9%)           | 7 (18.4%)         | 22 (61.2%)           | 4 (8.7%)             | 20 (54.1%)           | 3 (8.1%)             | 64 (57.7%)           | 14 (11.6%)         |
| <i>Girls</i>                                         | 21 (53.9%)           | 8 (20.5%)         | 42 (64.6%)           | 16 (25.4%)           | 21 (33.9%)           | 6 (10.5%)            | 84 (50.6%)           | 30 (18.9%)         |
| 3-10 yr olds                                         | 24 (45.3%)           | 9 (17.0%)         | 45 (67.2%)           | 17 (20.0%)           | 35 (46.7%)           | 6 (9.1%)             | 104 (53.3%)          | 32 (15.7%)         |
| as of 11yrs old                                      | 8 (80.0%)            | 2 (20.0%)         | 10 (58.8%)           | 3 (13.6%)            | 2 (13.4%)            | 3 (14.3%)            | 20 (47.6%)           | 8 (15.1%)          |

|                    |                   |                   |                      |                      |                      |                      |                    |                    |
|--------------------|-------------------|-------------------|----------------------|----------------------|----------------------|----------------------|--------------------|--------------------|
| <b>twice a day</b> | <b>34 (36.6%)</b> | <b>68 (73.1%)</b> | <b>51 (40.8%)</b>    | <b>90 (78.3%)</b>    | <b>62 (56.4%)</b>    | <b>91 (82.0%)</b>    | <b>147 (44.8%)</b> | <b>249 (78.1%)</b> |
| <i>Boys</i>        | 13 (34.2%)        | 29 (76.3%)        | 14 (38.9%)           | 41 (89.1%)           | 16 (43.2%)           | 30 (81.1%)           | 43 (38.7%)         | 100 (82.6%)        |
| <i>Girls</i>       | 15 (38.5%)        | 25 (64.1%)        | 23 (35.4%)           | 43 (68.3%)           | 41 (66.1%)           | 50 (87.7%)           | 79 (47.6%)         | 118 (74.2%)        |
| 3-10 yr olds       | 23 (43.4%)        | 39 (73.6%)        | 22 (32.8%)           | 65 (76.5%)           | 39 (52.0%)           | 57 (86.4%)           | 84 (43.1%)         | 161 (78.9%)        |
| as of 11yrs old    | 2 (20.0%)         | 6 (60.0%)         | 7 (41.2%)            | 18 (82.0%)           | 13 (86.7%)           | 17 (81.0%)           | 22 (52.4%)         | 41 (77.4%)         |
| <b>once a day</b>  | <b>3 (3.3%)</b>   | <b>6 (6.5%)</b>   | <b>0</b>             | <b>5 (4.3%)</b>      | <b>0</b>             | <b>6 (5.4%)</b>      | <b>3 (0.009%)</b>  | <b>17 (5.3%)</b>   |
| <i>Boys</i>        | 2 (5.2%)          | 1 (2.6%)          | 0                    | 1 (2.2%)             | 0                    | 4 (10.8%)            | 2 (0.02%)          | 6 (5.0%)           |
| <i>Girls</i>       | 0                 | 5 (12.8%)         | 0                    | 4 (6.3%)             | 0                    | 1 (1.8%)             | 0                  | 10 (6.3%)          |
| 3-10 yr olds       | 2 (3.8%)          | 4 (7.6%)          | 0                    | 3 (5.7%)             | 0                    | 3 (4.5%)             | 2 (0.01%)          | 10 (4.9%)          |
| as of 11yrs old    | 0                 | 1 (10.0%)         | 0                    | 1 (4.5%)             | 0                    | 1 (4.8%)             | 0                  | 3 (5.7%)           |
| <b>once a week</b> | <b>0</b>          | <b>1 (1.1%)</b>   | <b>0</b>             | <b>0</b>             | <b>1 (0.9%)</b>      | <b>0</b>             | <b>1 (0.003%)</b>  | <b>1 (0.003%)</b>  |
| <i>Boys</i>        | 0                 | 1 (2.6%)          | 0                    | 0                    | 1 (2.7%)             | 0                    | 1 (0.009%)         | 1 (0.008%)         |
| <i>Girls</i>       | 0                 | 0                 | 0                    | 0                    | 0                    | 0                    | 0                  | 0                  |
| 3-10 yr olds       | 0                 | 0                 | 0                    | 0                    | 1 (1.4%)             | 0                    | 1 (0.005%)         | 0                  |
| as of 11yrs old    | 0                 | 1 (10.0%)         | 0                    | 0                    | 0                    | 0                    | 0                  | 1 (1.9%)           |
| <b>other</b>       | <b>6 (6.5%)</b>   | <b>1 (1.1%)</b>   | <b>Not collected</b> | <b>Not collected</b> | <b>Not collected</b> | <b>Not collected</b> | <b>6 (1.8%)</b>    | <b>1 (0.003%)</b>  |
| <i>Boys</i>        | 1 (2.6%)          | 0                 |                      |                      |                      |                      | 1 (0.009%)         | 0                  |
| <i>Girls</i>       | 3 (7.7%)          | 1 (2.6%)          |                      |                      |                      |                      | 3 (1.8%)           | 1 (0.006%)         |
| 3-10 yr olds       | 4 (7.6%)          | 1 (1.9%)          |                      |                      |                      |                      | 4 (2.1%)           | 1 (0.005%)         |
| as of 11yrs old    | 0                 | 0                 |                      |                      |                      |                      | 0                  | 0                  |

Table S1: Overall results: Correlation analysis across all results with Pearson Correlation (knowledge correlated against behavior) was made and a significant (\*) correlation found ( $p < 0.05$ ).
