# Supplementary material for: Nutritional and Oral Hygiene Knowledge versus Reported Behavior of Children and Adolescents—A Cross-Sectional Interview-Based Study
Source: MDPI journal article supplement (doi:10.3390/ijerph191610055), 2022-08-15
Supplement: s1 [file s1]

## **Questionnaire S1**

Age:

- ☐ Male
- ☐ Female

### **Part One: Eating Habits**

1. How often do you eat sweets?

- ☐ daily
- ☐ never
- ☐ other

2. What do you eat in between the three main meals?

- ☐ sweets
- ☐ fruit yoghurt/bread/ pretzels
- ☐ fruit
- ☐ nothing
- ☐ dental care chewing gum
- ☐ other

3. How often do you eat something in between the three main meals?

- ☐ always/usually (> 4 times/ day)
- ☐ sometimes/seldom (< 4 times/ day)
- ☐ never
- ☐ other

4. What do you like to drink?

- ☐ Sugar sweetened beverages (SBB)
- ☐ cocoa
- ☐ water/ tea (unsweetened)
- ☐ other

5. How often do you drink sweet drinks?

- ☐ every day
- ☐ less than every day
- ☐ other

6. What do you do after eating candy or drinking something sweet?

- ☐ nothing
- ☐ chewing sweet chewing gum
- ☐ rinsing mouth with mouthwash
- ☐ chewing dental care chewing gum
- ☐ brushing teeth
- ☐ other

7. How often do you brush your teeth?

- ☐ once a week
- ☐ once a day
- ☐ twice a day
- ☐ three times every day
- ☐ other

## Part Two: Nutritional Knowledge

8. How often can you eat sweets?

- ☐ daily
- ☐ never
- ☐ other

9. What can you eat between the three main meals?

- ☐ sweets
- ☐ fruit yoghurt/bread/ pretzels
- ☐ fruit
- ☐ nothing
- ☐ dental care chewing gum
- ☐ other

10. What should you do after eating candy or drinking something sweet?

- ☐ nothing
- ☐ chewing sweet chewing gum
- ☐ rinsing mouth with mouthwash
- ☐ chewing dental care chewing gum
- ☐ brushing teeth
- ☐ other

11. How often should you brush your teeth?

- ☐ once a week
- ☐ once a day
- ☐ twice a day
- ☐ three times every day
- ☐ other

## **Questionnaire S2**

Age:

- ☐ Male
- ☐ Female

### **Part One: Eating Habits**

1. How often do you eat sweets?

- ☐ daily
- ☐ never
- ☐ other

2. How often do you eat something in between the three main meals?

- ☐ always/usually (> 4 times/ day)
- ☐ sometimes/seldom (< 4 times/ day)
- ☐ never
- ☐ other

3. What do you like to drink?

- ☐ Sugar sweetened beverages (SBB)
- ☐ cocoa
- ☐ water/ tea (unsweetened)
- ☐ other

4. How often do you drink sweet drinks?

- ☐ every day
- ☐ less than every day
- ☐ other

5. What do you do after eating candy or drinking something sweet?

- ☐ nothing
- ☐ chewing sweet chewing gum
- ☐ rinsing mouth with mouthwash
- ☐ chewing dental care chewing gum
- ☐ brushing teeth
- ☐ other

7. How often do you brush your teeth?

- ☐ once a week
- ☐ once a day
- ☐ twice a day
- ☐ three times every day
- ☐ other

## Part Two: Nutritional Knowledge

8. How often can you eat sweets?

- ☐ daily
- ☐ never
- ☐ other

9. What can you eat between the three main meals?

- ☐ sweets
- ☐ fruit yoghurt/bread/ pretzels
- ☐ fruit
- ☐ nothing
- ☐ dental care chewing gum
- ☐ other

10. How often can you eat something between the three main meals?

- ☐ always/usually (> 4 times/ day)
- ☐ sometimes/seldom (< 4 times/ day)
- ☐ never
- ☐ other

11. What should you drink?

- ☐ Sugar sweetened beverages (SBB)
- ☐ cocoa
- ☐ water/ tea (unsweetened)
- ☐ other

12. How often should you drink sweet drinks?

- ☐ every day
- ☐ less than every day
- ☐ other

13. What should you do after eating candy or drinking something sweet?

- ☐ nothing
- ☐ chewing sweet chewing gum
- ☐ rinsing mouth with mouthwash
- ☐ chewing dental care chewing gum
- ☐ brushing teeth
- ☐ other

14. How often should you brush your teeth?

- ☐ once a week
- ☐ once a day
- ☐ twice a day
- ☐ three times every day
- ☐ other
